# Supplementary material
Source: publisher figshare collection journal article supplement (https://frontiersin.figshare.com/ndownloader/files/30681044)
Supplement: Supplementary file [file 30681044]

## **Supplementary Methods**

### **STEMI diagnosis**

STEMI was diagnosed in the presence of chest pain lasting for at least 30 minutes accompanied by ST segment elevation ( $>2$  mm) in at least 2 anatomically contiguous leads.

### **Pressure-wire based measurements**

Pressure-wire-based coronary physiology was not performed if any of the following exclusion criteria were met: i) haemodynamic instability, ii) history of coronary artery bypass grafting, iii) severe chronic renal failure, iv) angiographic evidence of severe left main disease or complex coronary anatomy (tortuous IRA, presence of a chronic total occlusion), and v) pPCI performed with plain old balloon angioplasty.

Briefly, measurements were taken after intracoronary injection of 250 $\mu$ g of isosorbide dinitrate. Transit time was calculated as the average of transit time measurements during three separate injections of 3 ml of 0.9% room temperature saline at resting and hyperaemic conditions. Hyperaemia was induced by intravenous adenosine infusion at a rate of 140 $\mu$ g/kg/min. IMR was defined as the product of mean distal coronary pressure and mean transit time during hyperaemia.<sup>4</sup> Coronary flow reserve (CFR) was expressed as the ratio of resting to hyperaemic mean transit times.<sup>4</sup> Resistive reserve ratio (RRR) was defined as the ratio of resting to hyperaemic coronary microcirculatory resistance.<sup>11</sup>

### **TIMI Flow grade**

The Thrombolysis in Myocardial Infarction (TIMI) trial grading system was used as a semiquantitative angiographic tool to assess coronary flow before and at completion of pPCI on the IRA

## Statistical Methods

Missingness for ST segment resolution and CFR  $\leq 2.0$  was addressed by creating a third group for the variable (yes/no/unknown) whilst median imputation was utilised for discharge echocardiography LVEF. Proportional hazard assumptions were graphically and statistically assessed. Explanatory variables with a p-value of  $<0.1$  at univariate analysis were entered in the model using a conditional backward stepwise method.

## Supplementary Table

**Table S1. Clinical, Procedural & Echocardiographic Characteristics according to low versus high NH IMR<sub>angio</sub>**

|                                    | NH IMR <sub>angio</sub> ≤43U | NH IMR <sub>angio</sub> >43U | p value         |
|------------------------------------|------------------------------|------------------------------|-----------------|
| <b>Total Number</b>                | <b>136</b>                   | <b>126</b>                   |                 |
| <b>Clinical</b>                    |                              |                              |                 |
| Age, years                         | 60 ± 11                      | 64 ± 11                      | <b>&lt;0.01</b> |
| Male gender, n (%)                 | 118 (87)                     | 97 (77)                      | <b>0.04</b>     |
| Hypertension, n (%)                | 56 (42)                      | 63 (50)                      | 0.17            |
| Hypercholesterolemia, n (%)        | 50 (37)                      | 51 (41)                      | 0.54            |
| Diabetes, n (%)                    | 23 (17)                      | 18 (14)                      | 0.56            |
| Smoker, n (%)                      | 66 (49)                      | 44 (35)                      | <b>0.03</b>     |
| Previous cardiology history, n (%) | 17 (13)                      | 20 (16)                      | 0.45            |
| Family history of IHD, n (%)       | 55 (40)                      | 46 (37)                      | 0.51            |
| <b>Procedural</b>                  |                              |                              |                 |
| Ischemic time, minutes             | 158 (113, 293)               | 201 (137, 337)               | <b>0.02</b>     |
| <i>Target vessel</i>               |                              |                              |                 |
| LAD, n(%)                          | 55 (41)                      | 64 (51)                      | 0.37            |
| LCX, n(%)                          | 12 (9)                       | 13 (10)                      |                 |
| RCA, n(%)                          | 63 (46)                      | 46 (37)                      |                 |
| Other, n(%)                        | 6 (4)                        | 3 (2)                        |                 |

|                            |             |             |                 |
|----------------------------|-------------|-------------|-----------------|
| TIMI flow – pre-PCI        |             |             |                 |
| 0                          | 103 (76)    | 94 (75)     |                 |
| 1                          | 11 (8)      | 11 (9)      | 0.84            |
| 2                          | 14 (10)     | 16 (13)     |                 |
| 3                          | 8 (6)       | 5 (4)       |                 |
| TIMI flow – post-PCI       |             |             |                 |
| 0                          | 0 (0)       | 0 (0)       |                 |
| 1                          | 0 (0)       | 3 (2)       | <b>&lt;0.01</b> |
| 2                          | 8 (6)       | 25 (20)     |                 |
| 3                          | 128 (94)    | 98 (78)     |                 |
| <b>Complete ST segment</b> |             |             |                 |
| <b>resolution, n(%)</b>    | 87 (82%)    | 64 (64%)    | <b>&lt;0.01</b> |
| <b>Discharge</b>           |             |             |                 |
| <b>echocardiography</b>    | 53 (47, 56) | 49 (43, 55) | <b>0.03</b>     |
| <b>LVEF, %</b>             |             |             |                 |

*IHD: ischaemic heart disease; LAD: left anterior descending artery; LCx: left circumflex artery; LVEF: left ventricle ejection fraction; MVO: microvascular obstruction; NH IMR<sub>angio</sub>: non-hyperaemic IMR<sub>angio</sub>; PCI: percutaneous coronary intervention; RCA: right coronary artery; TIMI: the Thrombolysis in Myocardial Infarction. Values in bold denote a statistically significant result (p-value <0.05).*

**Table S2. Post PCI invasive and angiography-derived coronary physiology indices according to low versus high NH IMR<sub>angio</sub>.**

|                              | NH IMR <sub>angio</sub> ≤43U | NH IMR <sub>angio</sub> >43U | p-value         |
|------------------------------|------------------------------|------------------------------|-----------------|
| Total Number                 | 136                          | 126                          |                 |
| <b>Pressure-wire-derived</b> |                              |                              |                 |
| Resting Pa, mmHg             | 88 ± 16                      | 97 ± 18                      | <b>&lt;0.01</b> |
| Resting transit time, s      | 0.59 (0.38, 0.83)            | 0.88 (0.59, 1.40)            | <b>&lt;0.01</b> |
| Hyperaemic Pa, mmHg          | 80 (70, 89)                  | 85 (74, 95)                  | <b>&lt;0.01</b> |
| Hyperaemic Pd, mmHg          | 72 ± 14                      | 82 ± 16                      | <b>&lt;0.01</b> |
| Hyperaemic transit time, s   | 0.33 (0.24, 0.55)            | 0.59 (0.36, 1.03)            | <b>&lt;0.01</b> |
| FFR                          | 0.92 (0.88, 0.97)            | 0.95 (0.90, 0.99)            | <b>&lt;0.01</b> |
| IMR                          | 25 (17, 35)                  | 46 (29, 85)                  | <b>&lt;0.01</b> |
| CFR                          | 1.6 (1.2, 2.1)               | 1.4 (1.1, 1.9)               | <b>&lt;0.05</b> |
| RRR                          | 1.8 (1.3, 2.5)               | 1.6 (1.2, 2.2)               | <b>0.02</b>     |
| <b>Angiography-derived</b>   |                              |                              |                 |
| NH IMR <sub>angio</sub>      | 31 (22, 37)                  | 60 (50, 77)                  | <b>&lt;0.01</b> |
| Fixed flow QFR               | 0.95 (0.90, 0.98)            | 0.96 (0.90, 0.99)            | 0.65            |
| Contrast QFR                 | 0.95 (0.89, 0.98)            | 0.97 (0.91, 0.99)            | <b>&lt;0.04</b> |

*CFR: coronary flow reserve; FFR: fractional flow reserve; IMR: index of microvascular resistance; NH IMR<sub>angio</sub>: non-hyperaemic IMR<sub>angio</sub>; Pa: aortic pressure; Pd: distal pressure; PCI: percutaneous coronary intervention; QFR: quantitative flow ratio; RRR: resistive reserve ratio. Values in bold denote a statistically significant result (p-value <0.05).*

## Supplementary Figures

Figure S1

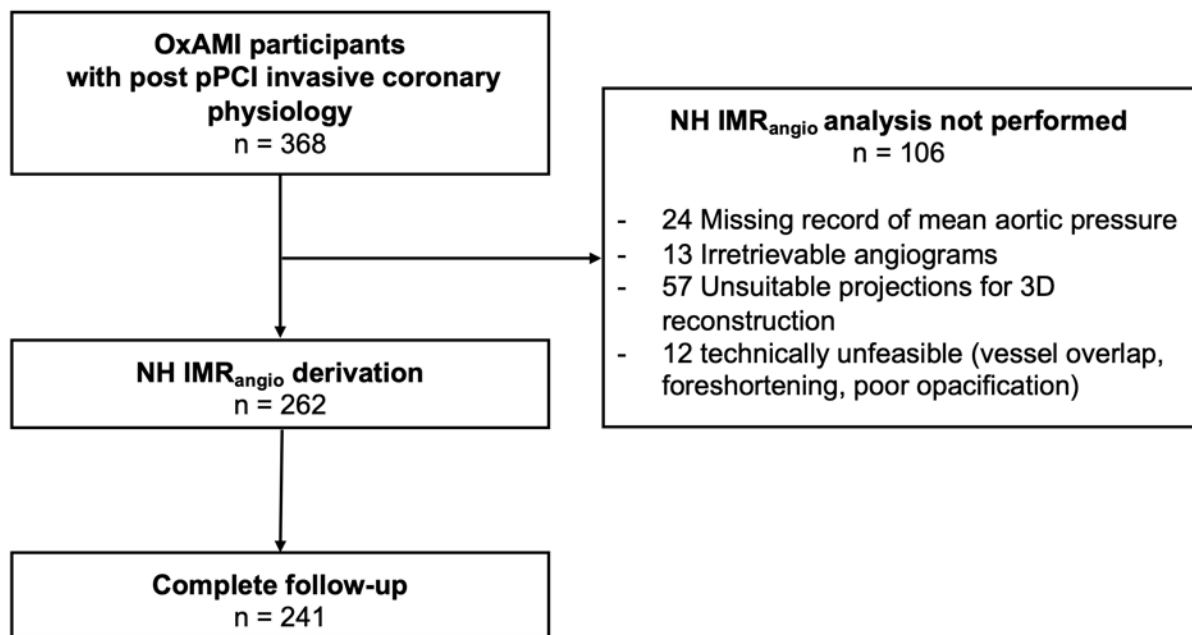

**Figure S1: Patient flow diagram**

*NH IMR<sub>angio</sub>: non-hyperaemic IMR<sub>angio</sub>; pPCI: primary percutaneous coronary intervention; 3D: three dimensional.*

Figure S2

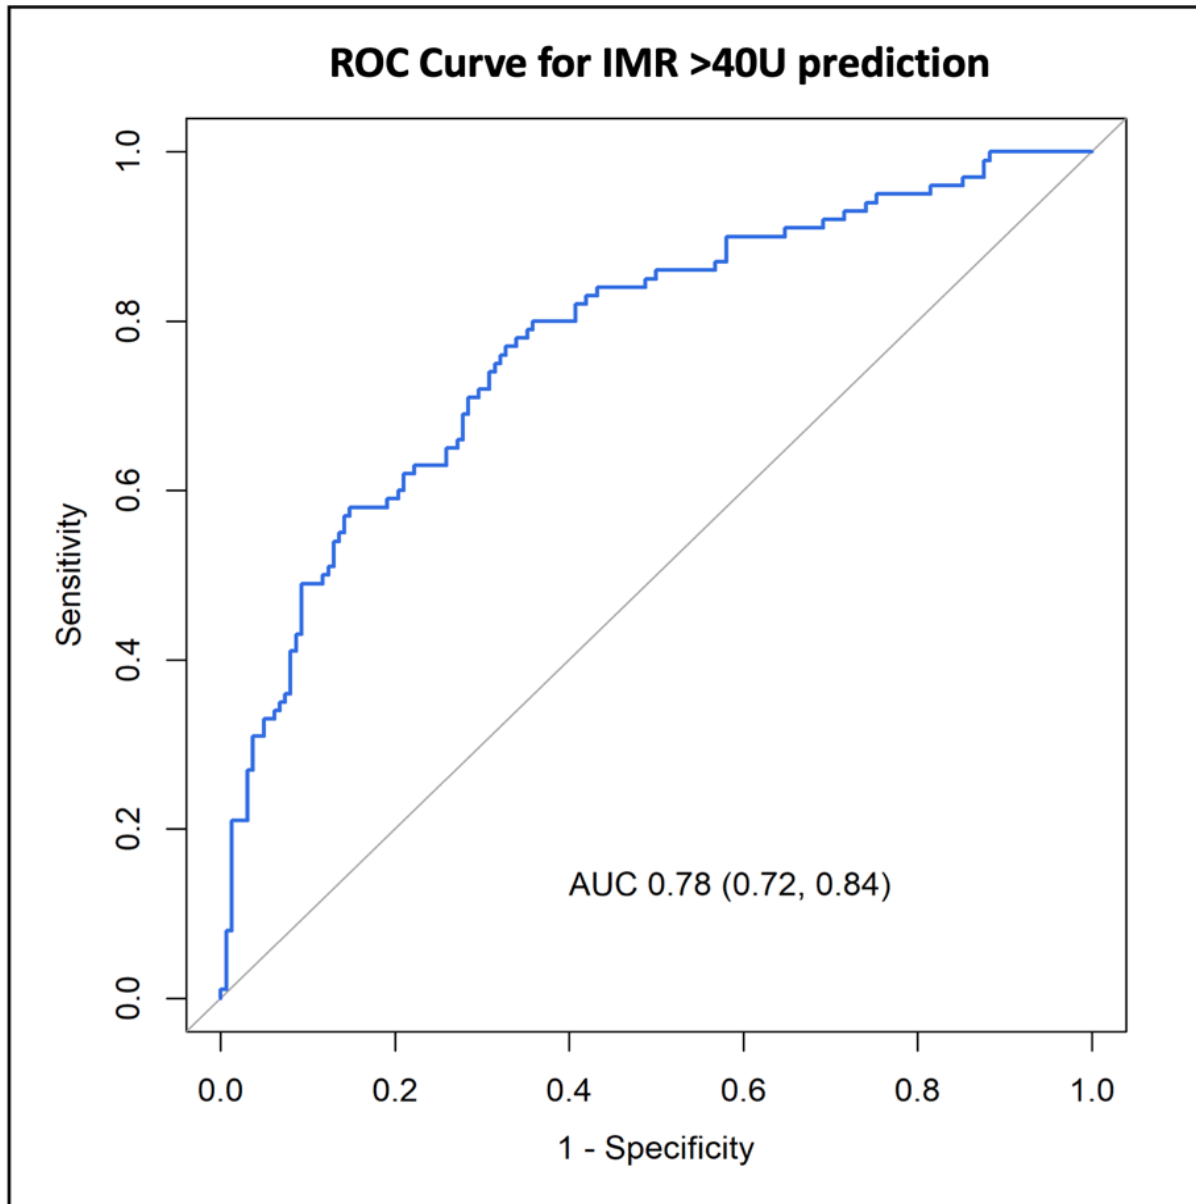

**Figure S2:** Diagnostic utility of NH  $IMR_{angio}$  in identifying an IMR >40U.

*AUC: area under the curve; IMR: index of microcirculatory resistance; NH  $IMR_{angio}$ : non-hyperaemic  $IMR_{angio}$ ; ROC: receiver operating characteristic.*

Figure S3

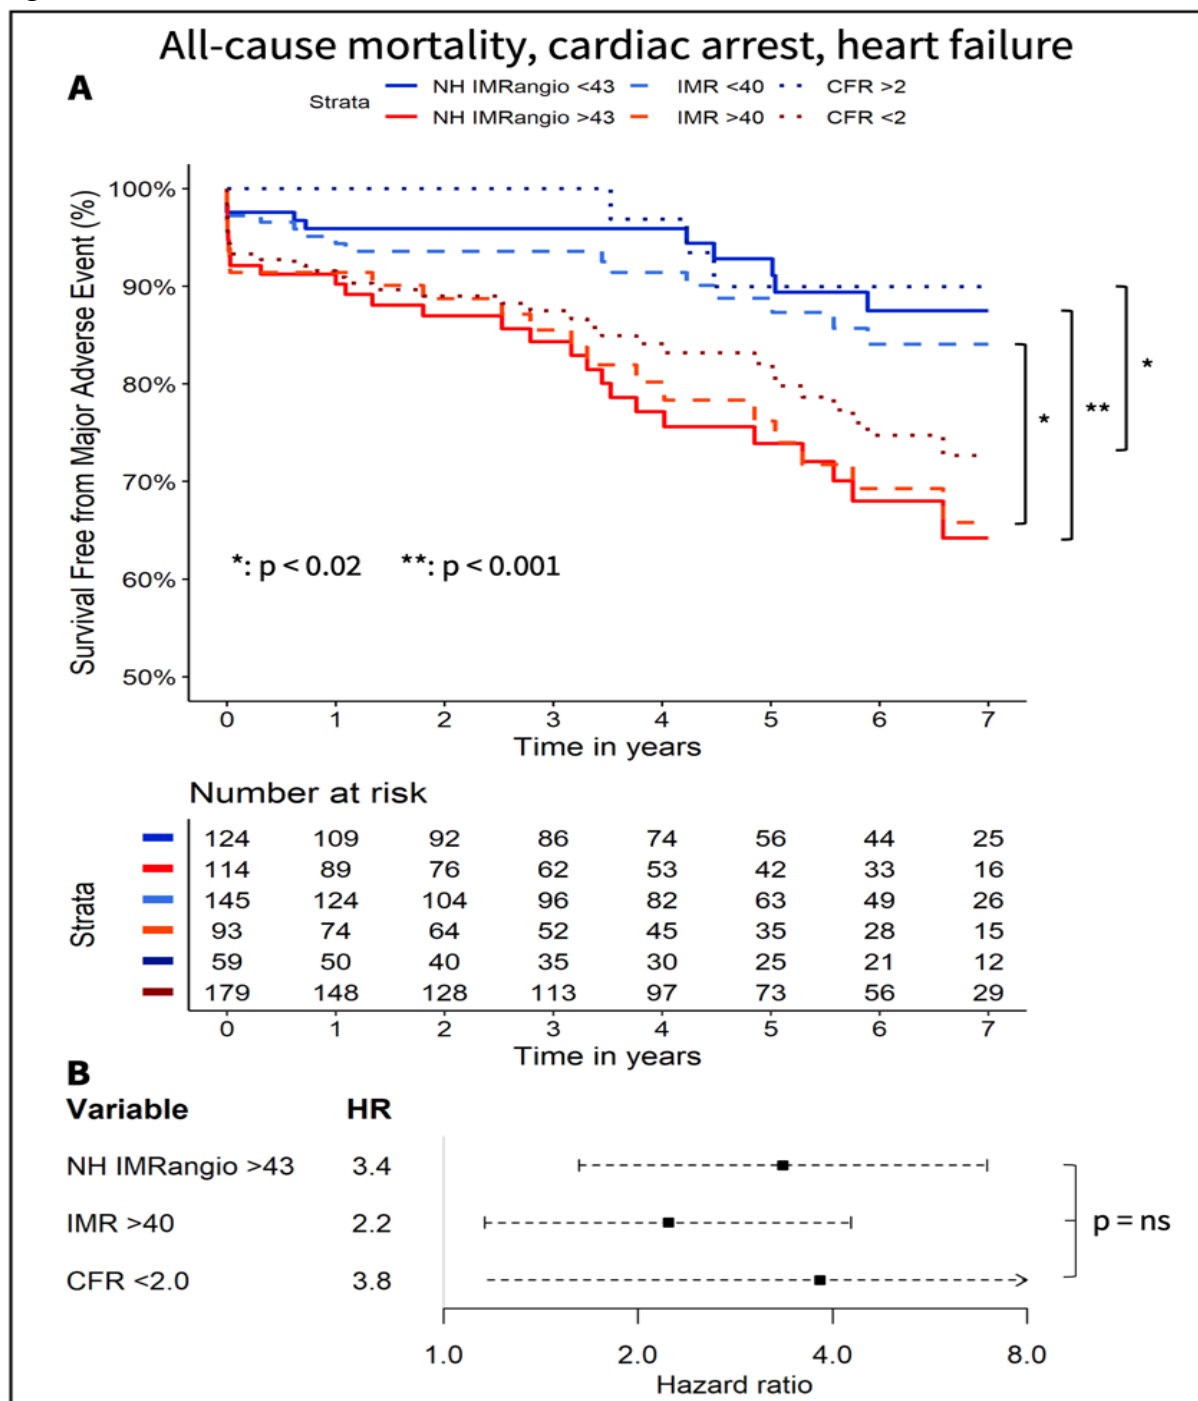

**Figure S3:** Kaplan Meier Curves of freedom from all-cause mortality, resuscitated cardiac arrest, new heart failure diagnosis with high versus low i) NH IMR<sub>angio</sub> and ii) IMR (A). Forrest plot displaying the hazard ratio of high i) NH IMR<sub>angio</sub> and ii) IMR (B).

CFR: coronary flow reserve; HR: hazard ratio; IMR: index of microcirculatory resistance; NH IMR<sub>angio</sub>: non-hyperaemic IMR<sub>angio</sub>; ns= not significant.



Figure S4

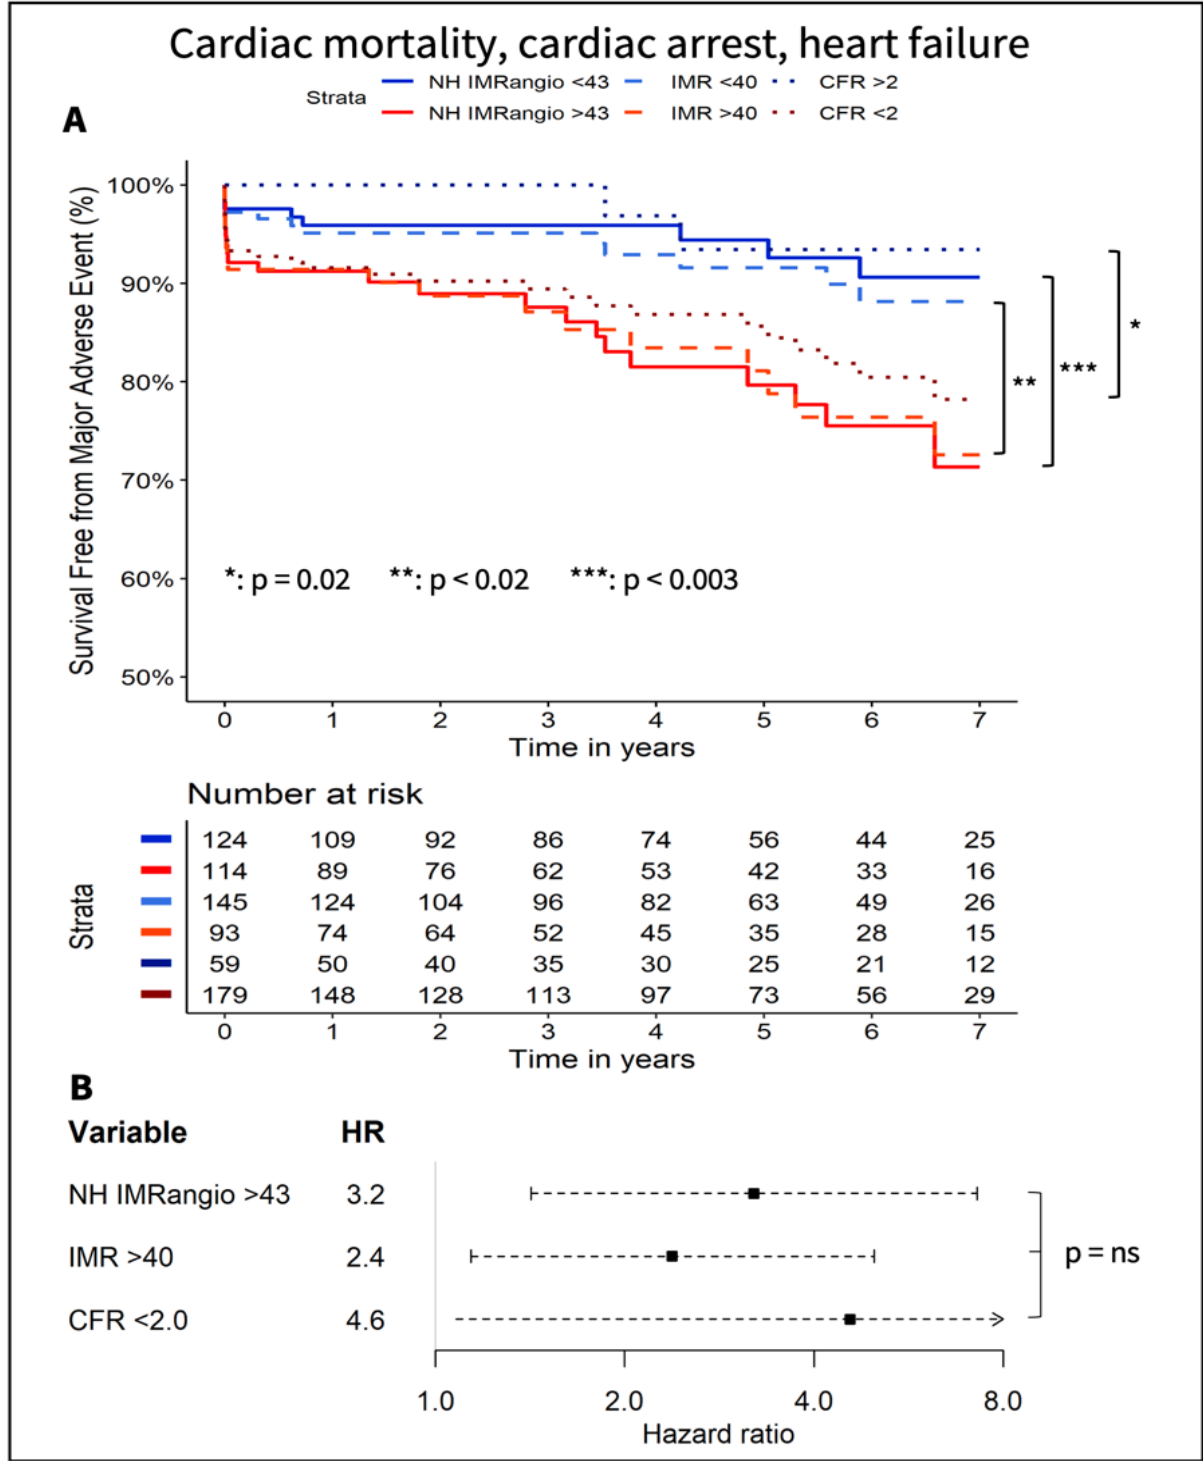

**Figure S4:** Kaplan Meier curves of freedom from cardiac mortality, resuscitated cardiac arrest, new heart failure diagnosis with high versus low i) NH IMR<sub>angio</sub>, ii) IMR and iii) CFR (A). Forrest plot displaying the hazard ratio of high i) NH IMR<sub>angio</sub>, ii) IMR, and iii) CFR (B). CFR: coronary flow reserve; HR: hazard ratio; IMR: index of microcirculatory resistance; NH IMR<sub>angio</sub>: non-hyperaemic IMR<sub>angio</sub>; ns= not significant.

**Figure S5**

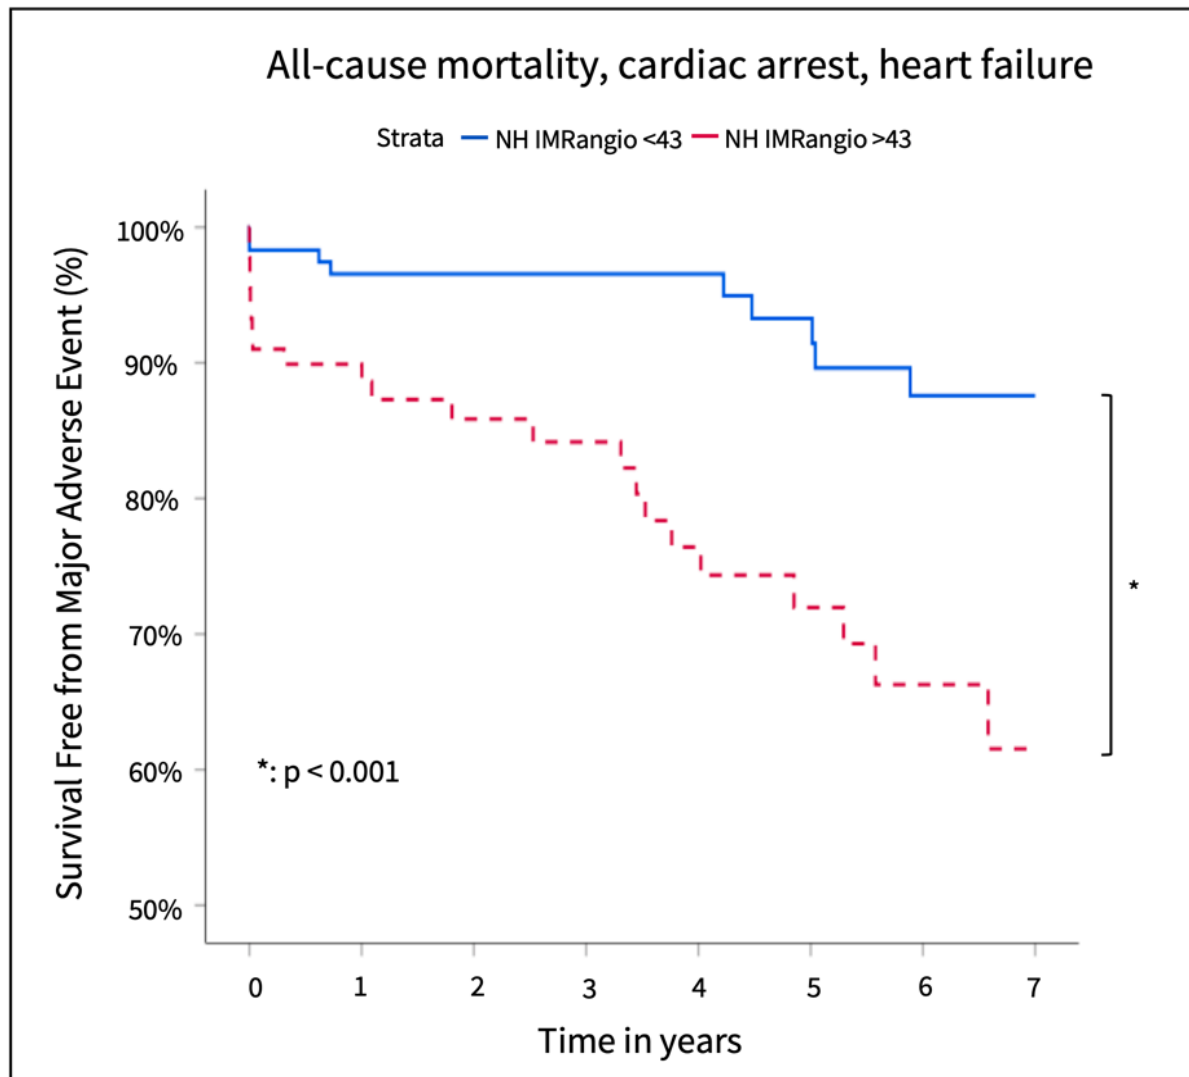

**Figure S5:** Kaplan Meier curves of freedom from cardiac mortality, resuscitated cardiac arrest, new heart failure diagnosis with high versus low NH IMR<sub>angio</sub> in 207 patients with post pPCI TIMI Flow 3.

*NH IMR<sub>angio</sub>: non-hyperaemic IMR<sub>angio</sub>; pPCI: primary percutaneous coronary intervention; TIMI: Thrombolysis in Myocardial Infarction.*
